# Supplementary material for: Liquid Crystalline π-Conjugated Copolymers Bearing a Pyrimidine Type Mesogenic Group
Source: MDPI journal article supplement (doi:10.3390/ma2010022), 2009-01-16
Supplement: s1 [file s1]

Correction

## Correction: Goto, H. *et al.* Liquid Crystalline $\pi$ -Conjugated Copolymers Bearing a Pyrimidine Type Mesogenic Group. *Materials* 2009, 2, 22-37

Kohsuke Kawabata and Hiromasa Goto \*

Institute of Materials Science, Graduate School of Pure and Applied Sciences, University of Tsukuba, Tsukuba, Ibaraki, 305-8573, Japan

\* Author to whom correspondence should be addressed; E-Mail: gotoh@ims.tsukuba.ac.jp; Tel. +81-29-853-5128; Fax: +81-29-853-4490.

Received: 11 October 2011 / Accepted: 9 January 2012 / Published: 9 January 2012

We found an error in the Scheme 1 in our paper published in *Materials* [1]. Corrected scheme is:

**Scheme 1.** Synthesis of monomer bearing LC moiety.

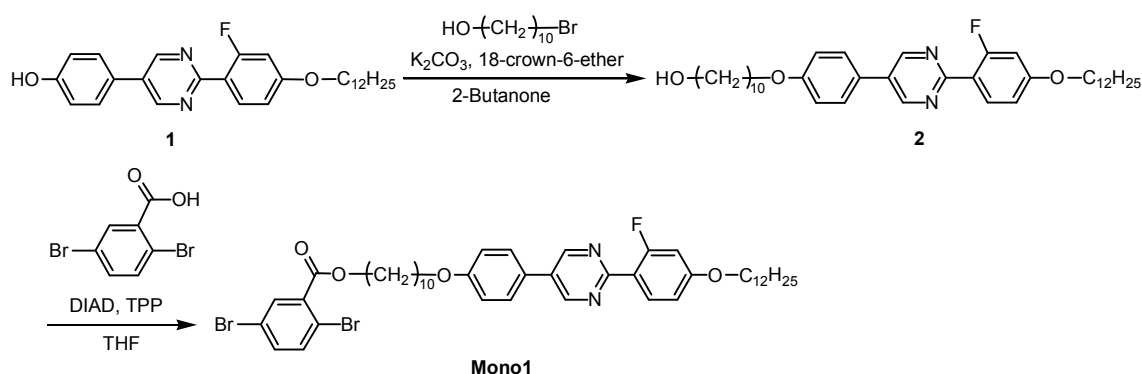

## References

1. Kawabata, K.; Goto, H. Liquid Crystalline  $\pi$ -Conjugated Copolymers Bearing a Pyrimidine Type Mesogenic Group. *Materials* **2009**, *2*, 22-37.

© 2012 by the authors; licensee MDPI, Basel, Switzerland. This article is an open access article distributed under the terms and conditions of the Creative Commons Attribution license (<http://creativecommons.org/licenses/by/3.0/>).
